# Supplementary material
Source: publisher site journal article supplement (https://www.dovepress.com/article/supplementary_file/625870/625870%20Revised%20Supplementary%20Table%20S1.docx)
Supplement: Supplementary file 1 [file 625870%20Revised%20Supplementary%20Table%20S1.docx]

| Ref. | Country | Age  (years) | Duration  (years) | Sex | Affected sites | Infection | Family history | Associated  diseases | Mutation |
| --- | --- | --- | --- | --- | --- | --- | --- | --- | --- |
| 1 | USA | 25 | 20 | M | Arm, thorax, abdomen |  |  |  |  |
| 2 | India | 16 | 3.5 | F | Face, dorsum, thorax, arm, axillae |  | Yes |  |  |
| 3 | Italy | 40 |  | F | Face, neck |  |  |  |  |
| 4 | Turkey | 31 | 1.5 | M | Face |  |  |  |  |
| 5 | Japan | 59 | 5 | F | Face |  |  |  |  |
| 6 | Iran | 70 | 30 | M | Scalp |  |  | Androgenic Alopecia |  |
| 7 | Italy | 52 |  | F | Dorsum, neck, scalp |  |  | PC-2 |  |
| 8 | Japan | 47 | 10 | F | Arm |  |  |  |  |
| 9 | Korea | 6 | 1 | M | Face |  | Yes | Nail dystrophy  PC-2  Hutchinson-like tooth | KRT17  c.411T>C  p.Met88Thr |
| 10 | Korea | 53 | 30 | M | Neck |  |  |  |  |
| 10 | Korea | 28 | 12 | M | Arm |  |  |  |  |
| 10 | Korea | 24 | 10 | M | Arm |  |  |  |  |
| 10 | Korea | 31 | 6 | F | Neck |  |  |  |  |
| 10 | Korea | 46 | 20 | M | Face |  |  |  |  |
| 11 | USA | 21 |  | M | Whole body | Yes | Yes | SMS |  |
| 12 | USA | 21 | 1 | M | Thorax, abdomen |  |  |  |  |
| 13 | Brazil | 20 | 12 | F | Axillae |  |  |  |  |
| 14 | Germany | 78 | 1 | F | Face |  |  |  |  |
| 15 | China |  |  |  |  |  | Yes |  | KRT17  c.G281A  p.Arg94His |
| 16 | UK | 17 |  | M | Axillae, inguinal, neck, thorax |  | Yes | Oligodontia | KRT17  c.1112T>C  p.Leu371Pro |
| 17 | China |  |  |  |  |  | Yes |  | KRT17  p.Arg94His |
| 17 | China |  |  |  |  |  | Yes |  | KRT17  p.Asn92Ser |
| 18 | Korea | 45 | 10 | M | Scalp |  |  |  |  |
| 19 | Italy | 17 |  | M | Dorsum, thorax, limbs |  | Yes | Familial syringoma |  |
| 20 | UK | 30 | 8 | M | Trunk |  |  |  |  |
| 21 | Korea | 63 |  | F | Scalp |  |  |  |  |
| 22 | Japan | 36 |  | F | Axillae |  | Yes | Nail dystrophy  PC-2 | KRT17  c.296T>C  p.Leu99Pro |
| 23 | Turkey | 16 |  | F | Thorax, face, axillae, thigh |  |  | Nail dystrophy  PC-2 |  |
| 24 | India | 30 |  | M | Perineum |  | Yes |  |  |
| 24 | India | 26 |  | M | Perineum |  |  |  |  |
| 25 | Poland | 38 | 25 | F | Face, neck, thorax, axillae, inguinal, perineum |  | Yes |  |  |
| 26 | Netherlands | 42 | 23 | F | Arm |  |  |  |  |
| 27 | USA | 32 | 25 | F | Face, neck, thorax, dorsum, arm, perineum | Yes | Yes | HS |  |
| 28 | India | 40 | 15 | M | Face, neck |  |  |  |  |
| 29 | Bangladesh | 60 | 15 | M | Perineum |  |  |  |  |
| 30 | Korea | 50 | 5 | M | Scalp |  |  | Alopecia |  |
| 31 | China | 28 | 11 | M | Face, thorax, axillae |  | Yes |  | KRT17  c. 280C>G  p.Arg94Gly |
| 32 | Singapore | 59 |  | F | thorax |  |  | SLE  Raynaud’s phenomenon  Sjögren’s syndrome |  |
| 33 | India | 40 | 1 | M | Trunk, dorsum |  |  | NF1 |  |
| 34 | Italy | 73 | 5 | F | Face |  |  |  |  |
| 34 | Italy | 62 | 5 | F | Face |  |  |  |  |
| 34 | Italy | 82 | 7 | M | Neck |  |  |  |  |
| 34 | Italy | 26 | 3 | F | Abdomen |  |  | Nodulocystic acne |  |
| 34 | Italy | 34 | 4 | F | Axillae |  |  |  |  |
| 34 | Italy | 30 | 3 | M | Face |  |  |  |  |
| 34 | Italy | 26 | 1 | F | Arm |  |  |  |  |
| 34 | Italy | 37 | 6 | F | Thorax |  |  |  |  |
| 34 | Italy | 22 | 7 | F | Abdomen |  | Yes |  |  |
| 34 | Italy | 39 | 4 | M | Dorsum |  |  |  |  |
| 34 | Italy | 51 | 4 | F | Dorsum |  |  | Hypothyroidism |  |
| 34 | Italy | 45 | 5 | M | Thorax |  |  |  |  |
| 34 | Italy | 38 | 2 | M | Axillae |  |  |  |  |
| 34 | Italy | 64 | 3 | M | Abdomen |  |  |  |  |
| 34 | Italy | 25 | 3 | F | Axillae |  |  |  |  |
| 34 | Italy | 34 | 5 | M | Abdomen |  |  |  |  |
| 34 | Italy | 52 | 2 | F | Dorsum |  |  |  |  |
| 34 | Italy | 75 | 10 | M | Neck |  |  |  |  |
| 34 | Italy | 19 | 2 | M | Thorax |  |  | Lichen Planus |  |
| 34 | Italy | 42 | 6 | F | Inguinal |  |  |  |  |
| 34 | Italy | 47 | 6 | F | Thorax |  |  |  |  |
| 34 | Italy | 63 | 5 | F | Thorax |  |  |  |  |
| 34 | Italy | 15 | 0 | M | Scalp |  |  |  |  |
| 34 | Italy | 30 | 3 | M | Thorax |  |  |  |  |
| 34 | Italy | 39 | 2 | F | Axillae |  |  |  |  |
| 34 | Italy | 45 | 2 | M | Axillae |  |  |  |  |
| 34 | Italy | 57 | 7 | M | Thorax |  |  |  |  |
| 34 | Italy | 22 | 2 | M | Arm |  |  | Multiple syringomas |  |
| 34 | Italy | 44 | 4 | F | Arm |  |  |  |  |
| 34 | Italy | 24 | 2 | F | Arm |  |  |  |  |
| 34 | Italy | 50 | 11 | F | Arm |  |  |  |  |
| 34 | Italy | 51 | 16 | F | Arm |  |  |  |  |
| 35 | Germany | 46 |  | M | Whole body | Yes | Yes |  | KRT17  c.280C>T  p.Arg94Cys |
| 36 | USA | 21 | 6 | F | Abdomen, thorax | Yes | Yes |  |  |
| 37 | USA | 26 | 8 | F | Thigh, gluteal, inguinal | Yes | Yes | SMS |  |
| 38 | India | 35 | 1 | F | Foot |  |  |  |  |
| 39 | India | 17 | 0.5 | F | Thorax, axillae, inguinal, extremities |  | Yes |  |  |
| 40 | China | 22 | 7 | M | Whole body |  | Yes |  | KRT17  c.71C>T  p.Ser24Leu |
| 41 | Argentina | 29 | 10 | F | Face, neck, thorax, Perineum |  |  |  |  |
| 42 | Italy | 0.83 | 0.67 | M | Face |  |  | Nail dystrophy  PC-2 |  |
| 43 | China | 14 | 13 |  | Thorax, axillae |  | Yes |  | KRT17  c.280C>T  p.Arg94Cys |
| 44 | UK | 41 |  | F | Trunk, neck, perineum |  |  |  |  |
| 44 | UK | 35 |  | M | Dorsum, thorax, axillae |  |  |  |  |
| 44 | UK | 27 |  | F | Gluteal, axillae, neck, dorsum, thorax |  |  |  |  |
| 44 | UK | 27 |  | M | Thorax |  |  |  |  |
| 44 | UK | 26 |  | F | Face |  |  |  |  |
| 44 | UK | 25 |  | M | Dorsum, thorax |  |  |  |  |
| 44 | UK | 25 |  | F | Neck, axillae, thorax, thigh |  |  |  |  |
| 44 | UK | 20 |  | M | Dorsum, thorax |  |  |  |  |
| 45 | France | 12 |  | F | Face, scalp, dorsum, thorax | Yes | Yes | Nail dystrophy  PC-2 | KRT17  c.275A>G  p.Asn92Ser |
| 46 | Spain | 34 | 20 | M | Face |  |  | Preauricular sinuses |  |
| 47 | Korea | 82 | 0.5 | F | Perineum |  |  |  |  |
| 48 | China | 26 | 10 | M | Neck, dorsum, thorax, arm |  | Yes |  | KRT17  c.T231C  p.Leu42Pro |
| 49 | China | 19 | 5 | M | Thorax, abdomen, arm |  |  |  |  |
| 50 | China | 38 | 6 | M | Thorax、axillae |  |  |  |  |
| 51 | Denmark | 22 |  | F | Inguinal, axillae, limbs, neck, abdomen | Yes | Yes | HS |  |
| 52 | China | 26 | 20 | M | Face, neck, thorax, abdomen, limbs |  | Yes |  | KRT17  c.280C>T  p.Arg94Cys |
| 53 | Poland | 30 | 8 | F | Neck, axillae, arm |  |  | Alopecia Areata |  |
| 54 | Germany | 71 | 10 | F | Face |  |  | eruptive vellus hair cysts |  |
| 55 | Japan | 48 |  | F | Whole body | Yes | Yes | Nail dystrophy  ADPKD | PKD1  c.9855_9856insAC |
| 56 | Brazil | 23 | 12 | F | Axillae, inguinal, dorsum, thorax, limbs, face, scalp | Yes | Yes | SMS |  |
| 57 | India | 25 |  | M | Scalp, face |  |  | Nail dystrophy  PC-2 |  |
| 58 | USA | 51 |  | F | Face |  |  |  |  |
| 59 | China |  |  |  | Face, neck |  | Yes |  | KRT17  c.G281A  p.Arg94His |
| 60 | USA | 15 | 8 | M | Thorax, abdomen |  |  |  |  |
| 61 | India | 22 | 7.5 | F | Face, neck, thorax |  | Yes | Nail dystrophy  PC-2 |  |
| 62 | Canada | 22 | 5 | F | Extremities, dorsum, thorax |  |  |  |  |
| 63 | India | 28 | 10 | M | Face, scalp |  |  |  |  |
| 64 | Korea | 50 | 40 | F | Trunk, neck, axillae, limbs |  | Yes |  | KRT17  **c.425G>T**  **p.Gln142His** |
| 65 | China | 53 |  | M | Whole body |  | Yes |  | KRT17  c.280 C>T  p.Arg94Cys |
| 66 | Italy | 22 | 5 | M | Arm |  |  |  |  |
| 66 | Italy | 50 |  | F | Dorsum, thorax |  |  |  |  |
| 66 | Italy | 20 | 2 | F | Axillae |  |  |  |  |
| 67 | Saudi Arabia | 28 | 10 | M | Scalp, face, neck, dorsum, thorax, axillae |  | Yes | SMS |  |
| 68 | Korea | 32 |  | M | Neck | Yes |  |  |  |
| 69 | Italy | 24 |  | F | Axillae |  |  | Psoriasis |  |
| 70 | Italy | 27 |  | M |  |  |  |  |  |
| 70 | Italy | 47 |  | M |  |  |  |  |  |
| 70 | Italy | 40 |  | F |  |  |  |  |  |
| 71 | Korea | 41 |  | M | Face, scalp, neck, dorsum, thorax, arm |  |  |  |  |
| 72 | China | 30 |  | F | Axillae |  |  |  |  |
| 73 | China | 20 |  |  | Axillae, gluteal, neck, face |  | Yes |  | KRT17  c.100G>A  p.Gly34Ser |
| 73 | China | 15 |  |  | Axillae, trunk, neck, face |  | Yes |  | KRT17  c.275A>C  p.Asn92Thr |
| 73 | China | 16 |  |  | Thorax, gluteal |  | Yes |  | KRT17  c.1045G>A  p.Val349Met |
| 74 | China | 74 | 10 | F | Scalp |  |  |  |  |
| 75 | India | 60 |  | M | thorax |  |  |  |  |
| 76 | Chile | 45 |  | F | Perineum |  |  | HS |  |
| 76 | Chile | 49 |  | F | Thorax |  |  |  |  |
| 76 | Chile | 27 |  | M | Neck |  |  |  |  |
| 76 | Chile | 16 |  | F | Axillae |  |  |  |  |
| 76 | Chile | 32 |  | M | Gluteal |  |  | Vellus hair cyst |  |
| 76 | Chile | 37 |  | F | Axillae |  |  |  |  |
| 76 | Chile | 39 |  | F | Axillae |  |  |  |  |
| 76 | Chile | 23 |  | F | Axillae |  |  | HS |  |
| 76 | Chile | 25 |  | F | Thorax |  |  | HS |  |
| 77 | India | 19 | 10 | M | Trunk, axillae, inguinal, gluteal, postauricular | Yes | Yes | SMS |  |
| 78 | Canada | 20 | 1 | F | Axillae |  |  | HS |  |
| 78 | Canada | 31 | 5 | F | Axillae, perineum |  |  | HS |  |
| 78 | Canada | 40 | 1 | F | Axillae |  |  | HS |  |
| 78 | Canada | 35 | 5 | F | Axillae |  |  | HS |  |
| 78 | Canada | 20 | 5 | M | Whole body |  |  | HS |  |
| 79 | China | 24 | 10 | M | Whole body |  | Yes | NF1 | NF1  c.730G>A  p.Glu244Lys |
| 80 | Singapore | 49 |  | F | Thorax, axillae, arm |  | Yes |  |  |
| 81 | China | 26 |  | M | Arm |  |  |  |  |
| 82 | USA | 47 |  | F | Thorax, arm, thorax, dorsum |  |  |  |  |

**Table S1**: Detailed information of reported cases identified from the literature review.

ADPKD, Autosomal Dominant Polycystic Kidney Disease; HS, Hidradenitis Suppurativa; NF1, Neurofibromatosis Type 1; PC-2, Pachyonychia congenita type 2; SLE, Systemic Lupus Erythematosus; SMS, steatocystoma multiplex suppurativa.

Reference

**1.** Chu DH. Steatocystoma multiplex. *Dermatol Online J.* 2003;9:18.

**2.** Kaur T, Kanwar AJ. Steatocystoma multiplex in four successive generations. *J Dermatol.* 2003;30:559-61.

**3.** Rossi R, Cappugi P, Battini M, Mavilia L, Campolmi P. CO2 laser therapy in a case of steatocystoma multiplex with prominent nodules on the face and neck. *Int J Dermatol.* 2003;42:302-4.

**4.** Duzova AN, Senturk GB. Suggestion for the treatment of steatocystoma multiplex located exclusively on the face. *Int J Dermatol.* 2004;43:60-2.

**5.** Yamada A, Saga K, Jimbow K. Acquired multiple pilosebaceous cysts on the face having the histopathological features of steatocystoma multiplex and eruptive vellus hair cysts. *Int J Dermatol.* 2005;44:861-3.

**6.** Mortazavi H, Taheri A, Mansoori P, Kani ZA. Localized forms of steatocystoma multiplex: case report and review of the literature. *Dermatol Online J.* 2005;11:22.

**7.** Cardinali C, Torchia D, Caproni M, Petrini N, Fabbri P. Case study: pachyonychia congenita: a mixed type II-type IV presentation. *Skinmed.* 2004;3:233-5.

**8.** Yanagi T, Matsumura T. Steatocystoma multiplex presenting as acral subcutaneous nodules. *Acta Derm Venereol.* 2006;86:374-5.

**9.** Oh SW, Kim MY, Lee JS, Kim SC. Keratin 17 mutation in pachyonychia congenita type 2 patient with early onset steatocystoma multiplex and Hutchinson-like tooth deformity. *J Dermatol.* 2006;33:161-4.

**10.** Lee SJ, Choe YS, Park BC, Lee WJ, Kim DW. The vein hook successfully used for eradication of steatocystoma multiplex. *Dermatol Surg.* 2007;33:82-4.

**11.** Adams B, Shwayder T. Steatocystoma multiplex suppurativum. *Int J Dermatol.* 2008;47:1155-6.

**12.** Laquer VT, Wu JJ, Tournas JA, Murase JE, Dyson SW. Pruritic bluish-black subcutaneous papules on the chest. *Dermatol Online J.* 2008;14:14.

**13.** de Almeida HL, Jr., Basso P. Linear unilateral steatocystoma multiplex. *J Eur Acad Dermatol Venereol.* 2009;23:213-4.

**14.** Riedel C, Brinkmeier T, Kutzne H, Plewig G, Frosch PJ. Late onset of a facial variant of steatocystoma multiplex - calretinin as a specific marker of the follicular companion cell layer. *J Dtsch Dermatol Ges.* 2008;6:480-2.

**15.** Jianfeng W, Yong C, Fusheng Z, et al. Study on KRT17 Gene Mutation in a Family with Multiple Steatocystoma. *Chinese Journal of Leprosy and Skin Diseases.* 2008;24:3.

**16.** Gass JK, Wilson NJ, Smith FJ, et al. Steatocystoma multiplex, oligodontia and partial persistent primary dentition associated with a novel keratin 17 mutation. *Br J Dermatol.* 2009;161:1396-8.

**17.** Wang JF, Lu WS, Sun LD, et al. Novel missense mutation of keratin in Chinese family with steatocystoma multiplex. *J Eur Acad Dermatol Venereol.* 2009;23:723-4.

**18.** Jeong SY, Kim JH, Seo SH, Son SW, Kim IH. Giant steatocystoma multiplex limited to the scalp. *Clin Exp Dermatol.* 2009;34:e318-9.

**19.** Marzano AV, Fiorani R, Girgenti V, Crosti C, Alessi E. Familial syringoma: report of two cases with a published work review and the unique association with steatocystoma multiplex. *J Dermatol.* 2009;36:154-8.

**20.** Madan V, August PJ. Perforation and extirpation of steatocystoma multiplex. *Int J Dermatol.* 2009;48:329-30.

**21.** Kim SJ, Park HJ, Oh ST, Lee JY, Cho BK. A case of steatocystoma multiplex limited to the scalp. *Ann Dermatol.* 2009;21:106-9.

**22.** Kanda M, Natsuga K, Nishie W, et al. Morphological and genetic analysis of steatocystoma multiplex in an Asian family with pachyonychia congenita type 2 harbouring a KRT17 missense mutation. *Br J Dermatol.* 2009;160:465-8.

**23.** Mumcuoglu CT, Gurel MS, Kiremitci U, Erdemir AV, Karakoca Y, Huten O. Er: yag laser therapy for steatocystoma multiplex. *Indian J Dermatol.* 2010;55:300-1.

**24.** Choudhary S, Koley S, Salodkar A. A modified surgical technique for steatocystoma multiplex. *J Cutan Aesthet Surg.* 2010;3:25-8.

**25.** Batycka-Baran A, Baran W, Maj J, Szepietowski JC. Cystic nodules affecting sexual activity: a quiz. Steatocystoma multiplex. *Acta Derm Venereol.* 2010;90:445-7.

**26.** Cuperus E, Leguit RJ, Sigurdsson V. Steatocystoma multiplex, a rare distribution of a rare disease. *Eur J Dermatol.* 2010;20:402-3.

**27.** Hollmig T, Menter A. Familial coincidence of hidradenitis suppurativa and steatocystoma multiplex. *Clin Exp Dermatol.* 2010;35:e151-2.

**28.** Varshney M, Aziz M, Maheshwari V, et al. Steatocystoma multiplex. *BMJ Case Rep.* 2011;2011.

**29.** Rahman MH, Islam MS, Ansari NP. Atypical steatocystoma multiplex with calcification. *ISRN Dermatol.* 2011;2011:381901.

**30.** Lee D, Chun J-S, Hong S-K, et al. Steatocystoma multiplex confined to the scalp with concurrent alopecia. *Annals of Dermatology.* 2011;23:S258-S60.

**31.** Dongjie Z, Cheng Z, Meili H, Xiaolei M, Zhang J. A novel mutation (p. Arg94Gly) of keratin 17 in a Chinese family with steatocystoma multiplex. *European Journal of Dermatology.* 2011;21:142-4.

**32.** Wan JM, Wong JS, Tee SI. Mammographic and sonographic findings of steatocystoma multiplex presenting as breast lumps. *Singapore Med J.* 2012;53:e261-3.

**33.** Elhence P, Bansal R, Sharma S, Jain V. Steatocystoma multiplex--an uncommon lesion with special emphasis on cytological features and cyto-histological correlation. *J Postgrad Med.* 2012;58:210-1.

**34.** Marzano AV, Tavecchio S, Balice Y, Polloni I, Veraldi S. Acral subcutaneous steatocystoma multiplex: a distinct subtype of the disease? *Australas J Dermatol.* 2012;53:198-201.

**35.** Antal AS, Kulichova D, Redler S, Betz RC, Ruzicka T. Steatocystoma multiplex: keratin 17 - the key player? *Br J Dermatol.* 2012;167:1395-7.

**36.** Moody MN, Landau JM, Goldberg LH, Friedman PM. 1,450-nm diode laser in combination with the 1550-nm fractionated erbium-doped fiber laser for the treatment of steatocystoma multiplex: a case report. *Dermatol Surg.* 2012;38:1104-6.

**37.** Gordon Spratt EA, Kaplan J, Patel RR, Kamino H, Ramachandran SM. Steatocystoma. *Dermatol Online J.* 2013;19:20721.

**38.** Jain M, Puri V, Katiyar Y, Sehgal S. Acral steatocystoma multiplex. *Indian Dermatol Online J.* 2013;4:156-7.

**39.** Kamra HT, Gadgil PA, Ovhal AG, Narkhede RR. Steatocystoma multiplex-a rare genetic disorder: a case report and review of the literature. *J Clin Diagn Res.* 2013;7:166-8.

**40.** Ha WW, Wang J, Wang W, et al. A novel missense mutation of keratin 17 gene in a chinese family with steatocystoma multiplex. *Ann Dermatol.* 2013;25:508-10.

**41.** Nestor Cabrera H, Hermida MD, Griffa E, Civitillo C, Porta J. Multiple cystic disease: K17 dysfunction? *Skinmed.* 2013;11:301-3.

**42.** Lo Schiavo A, Caccavale S, Alfano R, Romano F, Ruocco E. Pachyonychia congenita type 2: an unusual presentation. *Am J Dermatopathol.* 2013;35:619-20.

**43.** Ren X, Huang D, Wei W, et al. Clinical Investigation and Molecular Pathogenesis Study of Multiple Steatocystoma in a Family. *Chinese Journal of Drugs and Clinical Practice.* 2013;13:3.

**44.** Bakkour W, Madan V. Carbon dioxide laser perforation and extirpation of steatocystoma multiplex. *Dermatol Surg.* 2014;40:658-62.

**45.** Ofaiche J, Duchatelet S, Fraitag S, Nassif A, Nougue J, Hovnanian A. Familial pachyonychia congenita with steatocystoma multiplex and multiple abscesses of the scalp due to the p.Asn92Ser mutation in keratin 17. *Br J Dermatol.* 2014;171:1565-7.

**46.** Fernandez-Flores A, Cuesta CC, Garcia CS, del Rio JS. Steatocystoma multiplex associated with bilateral preauricular sinuses. *J Cutan Pathol.* 2014;41:677-9.

**47.** Park J, Hwang SR, Kim DW, Kim JI, Yun SK. Late onset localized steatocystoma multiplex of the vulva. *Indian J Dermatol Venereol Leprol.* 2014;80:89-90.

**48.** Xin Z, Yan Y, Shaoyin M, Xin T, Yaping T, Xibao Z. Study on Keratin 17 Gene Mutation in Multiple Steatocystoma. *Journal of Diagnosis and Treatment for Dermatovenereology.* 2014;21:4.

**49.** Mengqi S, Yongyan C, Wei L, Wei Y, Lu L. A Case of Multiple Steatocystoma Complicated with Eruptive Vellus Hair Cyst. *Chinese Journal of Dermatology and Venereology.* 2014;28:2.

**50.** Qiao G, Wang X, Liu M. A Familial Case of Multiple Steatocystoma Associated with KRT17 Gene Mutation. *Chinese Journal of Dermatology and Venereology.* 2014;28:2.

**51.** Kromann CB, Zarchi K, Nurnberg BM, Jemec GB. Recurring axillary, abdominal and genitofemoral nodules and abscesses. Hereditary steatocystoma multiplex. *Acta Derm Venereol.* 2015;95:121-3.

**52.** Liu Q, Wu W, Lu J, Wang P, Qiao F. Steatocystoma multiplex is associated with the R94C mutation in the KRTl7 gene. *Mol Med Rep.* 2015;12:5072-6.

**53.** Pietrzak A, Bartosinska J, Filip AA, et al. Steatocystoma multiplex with hair shaft abnormalities. *J Dermatol.* 2015;42:521-3.

**54.** Papakonstantinou E, Franke I, Gollnick H. Facial steatocystoma multiplex combined with eruptive vellus hair cysts: a hybrid? *J Eur Acad Dermatol Venereol.* 2015;29:2051-3.

**55.** Yoneda K, Nakai K, Demitsu T, Kubota Y. Polycystic kidney disease with steatocystoma multiplex: evidences for a disruptive effect of mutated polycystin-1 on keratin 17 polymerisation. *Acta Derm Venereol.* 2015;95:353-4.

**56.** Santana CN, Pereira DD, Lisboa AP, Leal JM, Obadia DL, Silva RS. Steatocystoma multiplex suppurativa: case report of a rare condition. *An Bras Dermatol.* 2016;91:51-3.

**57.** Sravanthi A, Srivalli P, Gopal KV, Rao TN. Pachyonychia congenita with late onset (PC tarda). *Indian Dermatol Online J.* 2016;7:278-80.

**58.** Kassira S, Korta DZ, de Feraudy S, Zachary CB. Fractionated ablative carbon dioxide laser treatment of steatocystoma multiplex. *J Cosmet Laser Ther.* 2016;18:364-6.

**59.** Kai L, Muping F, Xixiang M, Cheng W, Jingyu L. Report of a Family with Multiple Steatocystoma Caused by KRT17 Gene Mutation. Paper presented at: The 15th National Academic Conference on Medical Genetics of Chinese Medical Association2016.

**60.** Waldemer-Streyer RJ, Jacobsen E. A Tale of Two Cysts: Steatocystoma Multiplex and Eruptive Vellus Hair Cysts-Two Case Reports and a Review of the Literature. *Case Rep Dermatol Med.* 2017;2017:3861972.

**61.** Ghosh R, Chatterjee K, Barua JK, Roy A. Cutaneous Cysts with Nail Dystrophy in a Young Female: A Classical Association. *Indian J Dermatol.* 2017;62:661-4.

**62.** Georgakopoulos JR, Ighani A, Yeung J. Numerous asymptomatic dermal cysts: Diagnosis and treatment of steatocystoma multiplex. *Can Fam Physician.* 2018;64:892-9.

**63.** Sharma A, Agrawal S, Dhurat R, Shukla D, Vishwanath T. An Unusual Case of Facial Steatocystoma Multiplex: A Clinicopathologic and Dermoscopic Report. *Dermatopathology (Basel).* 2018;5:58-63.

**64.** Kim JY, Park JH, Sohng C, Jang YH, Lee SJ, Lee WJ. Huge Steatocystoma Multiplex with New Point Mutation in the Exon 1 of KRT 17 Gene. *Ann Dermatol.* 2018;30:633-5.

**65.** Wang J, Li J, Li X, et al. A recurrent mutation in the KRT17 gene responsible for severe steatocystoma multiplex in a large Chinese family. *Clin Exp Dermatol.* 2018;43:205-8.

**66.** Zussino M, Nazzaro G, Moltrasio C, Marzano AV. Coexistence of steatocystoma multiplex and hidradenitis suppurativa: Assessment of this unique association by means of ultrasonography and Color Doppler. *Skin Res Technol.* 2019;25:877-80.

**67.** Alotaibi L, Alsaif M, Alhumidi A, Turkmani M, Alsaif F. Steatocystoma Multiplex Suppurativa: A Case with Unusual Giant Cysts over the Scalp and Neck. *Case Rep Dermatol.* 2019;11:71-6.

**68.** Shin NY, Kang JH, Kim JE, et al. Steatocystoma multiplex: A case report of a rare entity. *Imaging Sci Dent.* 2019;49:317-21.

**69.** Marasca C, Megna M, Donnarumma M, Fontanella G, Cinelli E, Fabbrocini G. A Case of Steatocystoma Multiplex in a Psoriatic Patient during Treatment with Anti-IL-12/23. *Skin Appendage Disord.* 2020;6:309-11.

**70.** Atzori L, Zanniello R, Pilloni L, Rongioletti F. Steatocystoma multiplex suppurativa associated with hidradenitis suppurativa successfully treated with adalimumab. *J Eur Acad Dermatol Venereol.* 2019;33 Suppl 6:42-4.

**71.** Cheon DU, Ko JY. 1927-nm fiber-optic diode laser: A novel therapeutic option for facial steatocystoma multiplex. *J Cosmet Dermatol.* 2019;18:1326-9.

**72.** Lin KP, Chang ME, Ho WT. Treatment of steatocystoma multiplex on axillae using keyhole approach technique. *J Cosmet Laser Ther.* 2019;21:1.

**73.** Zhang B, Sun L, Fu X, Yu G, Liu H, Zhang F. Mutation analysis of the KRT17 gene in steatocystoma multiplex and a brief literature review. *Clin Exp Dermatol.* 2020;45:132-4.

**74.** Jiang M, Zhang M, Gu H, Chen X. A case of late onset steatocystoma multiplex. *Postepy Dermatol Alergol.* 2020;37:117-8.

**75.** Dixit N, Sardana K, Paliwal P. The rationale of ideal pulse duration and pulse interval in the treatment of steatocystoma multiplex using the carbon dioxide laser in a super-pulse mode as opposed to the ultra-pulse mode. *Indian J Dermatol Venereol Leprol.* 2020;86:454-6.

**76.** Arceu M, Martinez G, Alfaro D, Wortsman X. Ultrasound Morphologic Features of Steatocystoma Multiplex With Clinical Correlation. *J Ultrasound Med.* 2020;39:2255-60.

**77.** Ahmed G, Prabha N, Ganguly S. Familial Steatocystoma Multiplex Generalisita Suppuritiva: Oral Rifampicin and Clindamycin Combination Worth a Trial. *Indian J Dermatol.* 2021;66:553-5.

**78.** Fletcher J, Posso-De Los Rios C, Jambrosic J, Alavi A. Coexistence of Hidradenitis Suppurativa and Steatocystoma Multiplex: Is It a New Variant of Hidradenitis Suppurativa? *J Cutan Med Surg.* 2021;25:586-90.

**79.** Zhang Y, Fang M, Ding X, Tang L, Zhang X. Familial neurofibromatosis type 1 has diverse manifestations in skin and is associated with steatocystoma multiplex. *Clin Exp Dermatol.* 2021;46:1166-9.

**80.** Chotai N, Lim SK. Imaging features of steatocystoma multiplex- back to basics. *Breast J.* 2021;27:389-90.

**81.** Cheng CY. Ultrasound-Guided Intralesional Cryotherapy for Treatment of Steatocystoma Multiplex. *Dermatol Surg.* 2021;47:1020-1.

**82.** Reick-Mitrisin V, Reddy A, Shah BA. A Breast Imaging Case of Steatocystoma Multiplex: A Rare Condition Involving Multiple Anatomic Regions. *Cureus.* 2022;14:e27756.
